# Supplementary material
Source: HighWire-hosted journal article supplement (http://www.cfp.ca/highwire/filestream/30385/field_highwire_adjunct_files/0/Brain_map.pdf)
Supplement: Brain_map.pdf [file Brain_map.pdf]

# The Centre for Family Medicine Memory Clinic Brain Map

Name: \_\_\_\_\_

Date: \_\_\_\_\_

## Is it Delirium?

|                                 |     |    |
|---------------------------------|-----|----|
| Acute onset?                    | Yes | No |
| Fluctuating course?             | Yes | No |
| Inattention?                    | Yes | No |
| Disorganized thinking?          | Yes | No |
| Altered level of consciousness? | Yes | No |

## Is it Depression?

|                 |     |    |
|-----------------|-----|----|
| SIGECAPS or GDS | Yes | No |
|-----------------|-----|----|

## Is there a reversible cause?

|  |     |    |
|--|-----|----|
|  | Yes | No |
|--|-----|----|

## Are there impaired Activities of Daily Living?

| <b>Independent Activities of Daily Living</b>     | <b>Basic Activities of Daily Living</b> |
|---------------------------------------------------|-----------------------------------------|
| Shopping/social functioning                       | Dressing                                |
| Housework/hobbies                                 | Eating                                  |
| Accounting – banking, bills, taxes, handling cash | Ambulation                              |
| Food preparation                                  | Toileting                               |
| Telephone/Tools/Transportation                    | Hygiene                                 |
| Medication management                             |                                         |

<sup>1</sup> Criteria for ordering cranial imaging (CT or MRI) for suspected dementia: age less than 60 years, rapid or unexplained decline in cognition or function, dementia of relatively short duration (less than 2 years), recent significant head trauma, history of cancer, use of anticoagulants or history of bleeding disorder, history of urinary incontinence and gait disorders, unexplained neurological symptoms, presence of any new localizing sign, unusual or atypical cognitive symptoms or presentation, gait disturbance, or if presence of suspected cerebrovascular disease would change clinical management.

Are there deficits involving the **medial temporal lobe/hippocampus**?

|                 |                                                        |        |   |          |   |   |   |
|-----------------|--------------------------------------------------------|--------|---|----------|---|---|---|
| Episodic Memory | 3 word recall on MMSE                                  | 3      | 2 | 1        | 0 |   |   |
|                 | 5 word recall on MoCA                                  | 5      | 4 | 3        | 2 | 1 | 0 |
|                 | current day/day of week/season                         | intact |   | impaired |   |   |   |
|                 | current events                                         | intact |   | impaired |   |   |   |
|                 | what the person had for breakfast/dinner(corroborated) | intact |   | impaired |   |   |   |

Are there deficits involving the **parietal lobe**?

|                            |                                |        |                       |
|----------------------------|--------------------------------|--------|-----------------------|
| Visuospatial Relationships | intersecting pentagons on MMSE | intact | impaired              |
|                            | cube draw on MoCA              | intact | impaired              |
|                            | clock draw                     | intact | impaired <sup>1</sup> |

<sup>1</sup>parietal and frontal (visuospatial and executive function)

Are there deficits involving the **frontal lobe**?

|                    |                                            |        |                       |
|--------------------|--------------------------------------------|--------|-----------------------|
| Working Memory     | digit span or WORLD forwards               | intact | impaired              |
|                    | digit span or WORLD backwards              | intact | impaired              |
| Executive Function | clock draw                                 | intact | impaired <sup>1</sup> |
|                    | Luria hand test                            | intact | impaired              |
|                    | Trails B (task switching)                  | Intact | impaired              |
|                    | "f" words: _____ (phonemic verbal fluency) | 11+    | <11                   |
|                    | months of year backwards                   | intact | impaired              |
|                    | animal list generation: _____              | intact | impaired <sup>2</sup> |
|                    | proverbs, similarities (abstraction)       | intact | impaired              |

<sup>1</sup>frontal and parietal (executive and visuospatial function)

<sup>2</sup>frontal and anterior/inferolateral temporal lobe (executive function and semantic memory)

**Note: subcortical lesions can cause deficits in many of the above areas**
